# Supplementary material for: Metaphor—A workflow for streamlined assembly and binning of metagenomes
Source: PubMed Central journal article supplement (PMC10388702; doi:10.1093/gigascience/giad055), 2023-07-31
Supplement: giad055_response_to_reviewer_comments_original_submission.pdf [file giad055_response_to_reviewer_comments_original_submission.pdf]

## Author's Response To Reviewer Comments

Close

Dear editor,  
See attached files in the submission

Close
